# Supplementary material for: Correlation between BPI Gene Upstream CpG Island Methylation and mRNA Expression in Piglets
Source: MDPI journal article supplement (doi:10.3390/ijms150610989), 2014-06-18
Supplement: s1 [file s1]

## Supplementary Information

**Figure S1.** *BPI* gene methylation levels in piglet age groups. CpG sites are marked with pie charts, black region represent methylation level; <sup>a,b</sup> The means with different superscripts within the same CpG sites differ significantly ( $p < 0.05$ ).

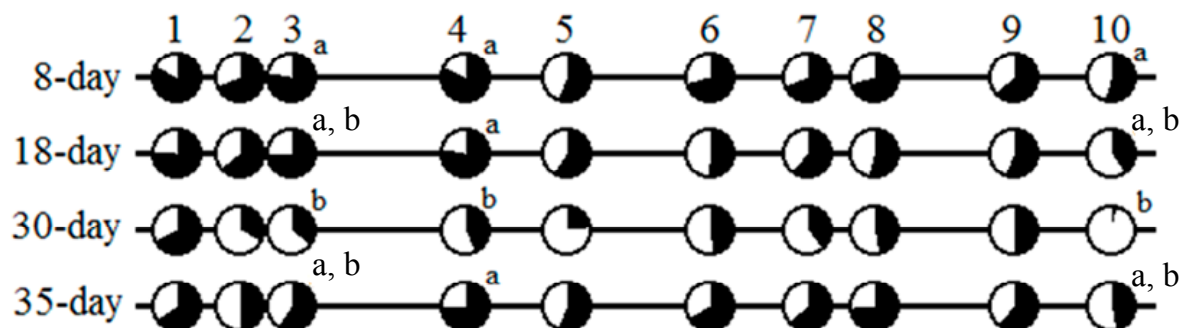

**Table S1.** Correlation analysis of methylation level and mRNA expression in the porcine *BPI* gene.

| CpG Site | Correlation Coefficient | <i>p</i> -Value |
|----------|-------------------------|-----------------|
| Overall  | -0.463                  | 0.071           |
| CpG_1    | -0.503                  | 0.047           |
| CpG_2    | -0.376                  | 0.151           |
| CpG_3    | -0.529                  | 0.035           |
| CpG_4    | -0.680                  | 0.004           |
| CpG_5    | -0.312                  | 0.239           |
| CpG_6    | -0.455                  | 0.077           |
| CpG_7    | -0.567                  | 0.022           |
| CpG_8    | -0.291                  | 0.274           |
| CpG_9    | -0.194                  | 0.471           |
| CpG_10   | -0.377                  | 0.150           |
